# Supplementary material
Source: PubMed Central journal article supplement (PMC3596642)

## Figure Legends of Supplemental Data

### **ARF6 and GASP-1 Are Post-endocytic Sorting Proteins Selectively Involved in GRK- and PKC-mediated Intracellular Trafficking of Dopamine D<sub>2</sub> Receptor**

DI Cho<sup>1</sup>, M Zheng<sup>1</sup>, C Min, KJ Kwon\*, CY Shin\*, HK Choi<sup>§</sup>, KM Kim<sup>#</sup>

*Department of Pharmacology, College of Pharmacy, Drug Development Research Institute, Chonnam National University, Gwang-Ju, 500-757 Korea, \*Department of Pharmacology, School of Medicine, Konkuk University, 1 Hwayang-dong, Gwangjin-gu, Seoul 143-701, Korea, and <sup>§</sup>College of Pharmacy, Chosun University, Gwang-Ju, 501-709 Korea.*

#### **Figure S1. Characterization of PMA-induced desensitization of D<sub>2</sub> receptor.**

- (A) Dose-response curve of D<sub>2</sub> receptor for the inhibition of cAMP production. Cyclic AMP was measured by column chromatography as described in *Materials and methods*. Receptor expression levels were maintained around 1.4 pmol/mg protein.
- (B) Effects of PKC inhibitor Gö6976 on the PMA-induced desensitization of D<sub>2</sub> receptor. Cells were pre-treated with 1 μM Gö6976 for 20 min and then treated with 1 μM PMA for 15 min, followed by determination of dose-response curves. \*\*\*:*p*<0.001 when Veh/PMA group was compared to Veh/Veh group.
- (C) Effects of PKC inhibitor Gö6983 on the PMA-induced desensitization of D<sub>2</sub> receptor. Cells were pre-treated with 1 μM Gö6983 for 20 min and then treated with 1 μM PMA for 15 min. \*\*: *p*<0.01 when 'Veh/PMA' group was compared to 'Veh/Veh' group.
- (D) Involvement of PKC in the desensitization of D<sub>2</sub> receptor. Cells expressing D<sub>2</sub> receptor were treated with 1 μM PMA or 4α-PMA for 15 min, followed by determination of dose-response curves. \*\*\*:*p*<0.001 when PMA group was compared to vehicle or 4α-PMA group.

**Figure S2. Characterization of mutants of D<sub>2</sub> receptor at S/T residues in the PMA-induced desensitization of D<sub>2</sub> receptor.**

- (A) Effects of mutations of T144/S147/S148 (#3) on the PMA-induced desensitization of D<sub>2</sub> receptor. \*:p<0.05 when PMA group was compared to each vehicle group. Receptor expression levels were maintained around 1.8 pmol/mg protein.
- (B) Effects of mutation of S147 and S148 on the PMA-induced desensitization of D<sub>2</sub> receptor. \*:p<0.05 when PMA group was compared to each vehicle group.
- (C) Effects of mutations of T322 and T324 on the PMA-induced desensitization of D<sub>2</sub> receptor. \*:p<0.05 when PMA group was compared to each vehicle group.
- (D) Effects of mutations of S/T residues involved in the PKC-mediated desensitization on the PMA-induced internalization of D<sub>2</sub> receptor. \*\*\*:p<0.001 compared with WT group.

**Figure S3. Functional analysis of S/T residues located within the endocytic motif of the 3<sup>rd</sup> intracellular loop, and associated plasma membrane microdomain in which PKC-mediated internalization of D<sub>2</sub> receptor occurs.**

Effects of point mutation of T225, S228, and S229 on the PKC-mediated desensitization of D<sub>2</sub> receptor. Cells expressing wild-type or each S/T mutant of D<sub>2</sub> receptor were treated with 1 μM PMA for 15 min, and the dose-response curves were determined. \*:p<0.05 when PMA-treated group was compared to each vehicle group.

**Figure S4. Roles of β-arrestins and Rab5/Rab23 in the recycling of homologously internalized D<sub>2</sub> receptor.**

- (A) Preparation of double knockout cell lines of β-arrestin1/2. Double knockdown of β-arrestins was conducted as described in *Materials and methods*.
- (B) Roles of β-arrestins in the recycling of D<sub>2</sub> receptor. Cells expressing D<sub>2</sub> receptor (around 0.9 pmol/mg protein) were treated with 50 μg/ml cyclohexamide, followed by 10 μM DA for 60 min. After washing with serum-free medium, cells were incubated at 37 °C for the indicated period of time.

(C) Roles of Rab5 in the recycling of D<sub>2</sub> receptor. Cells stably expressing D<sub>2</sub> receptor (~1.1 pmol/mg protein) were transfected with Mock, WR-Rab5, or S34N-Rab5.

(D) Roles of Rab23 in the recycling of D<sub>2</sub> receptor. Cells stably expressing D<sub>2</sub> receptor (~1.1 pmol/mg protein) were transfected with Mock, WR-Rab23, or S23V-Rab23.

### **Figure S5. Roles of ARF6 in the intracellular trafficking of D<sub>2</sub> receptor.**

(A) Roles of ARF6-induced downregulation of D<sub>2</sub> receptor. HEK-293 cells stably expressing D<sub>2</sub> receptor were co-expressed with empty vector, ARF6-WT, ARF6-T27N, or ARF-Q67L, treated with 1 μM quinpirole for 12 hr and 24 hr. Receptor binding was determined as in Figure 1D.

(B) Effects of fast cycling ARF6 mutant on the recycling of homologously internalized D<sub>2</sub> receptor. Cells were transfected with wild-type, T157N-, or Q67L-ARF6. The recycling of homologously internalized D<sub>2</sub> receptor was determined as in Figure 5A. \*\*\*:*p*<0.001 when Q67L group was compared to WT or T157N group.

(C) Effects of ARF6 on the down-regulation of D<sub>2</sub> receptor in response to long-term PMA stimulation. HEK-293 cells expressing ARF6 constructs were treated with vehicle or 1 μM PMA for 12h or 24h, and receptor binding was conducted as in Figure 1D.

(D) Effects of knockdown of endogenous ARF6 on the recycling of internalized D<sub>2</sub> receptor. HEK-293 cells stably expressing scrambled shRNA or ARF6 shRNA were transfected with D<sub>2</sub> receptor. Receptor recycling was determined as in Figure 1C.

### **Figure S6. Roles of GASP-1 in the recycling of D<sub>2</sub> receptor internalized in response to PMA stimulation.**

(A) Effects of PKC inhibitors on the interaction between D<sub>2</sub> receptor and GASP-1. HEK-293 cells expressing FLAG-D<sub>2</sub>R and GFP-GASP-1 were pretreated with 1 μM Gö6976 or Gö6983 for 20 min, followed by 1 μM PMA for 5 min. Immunoprecipitation was conducted as in Figure 6D. \*\*: *p*<0.01, \*\*\*:*p*<0.001 when PMA group was compared with corresponding Veh group.

(B) Roles of GASP-1 in the recycling of D<sub>2</sub> receptor in SH-SY5Y dopaminergic

neuroblastoma cells. (Upper two panels) Roles of GASP-1 in the recycling of D<sub>2</sub> receptor. Cells transfected with FLAG-D<sub>2</sub>R and GFP-GASP-1 were stimulated with 1 μM PMA for 60 min (middle panel), followed by washing and incubation at 37 °C for 60 min (right panel). Immunocytochemistry was conducted as in Figure 5B. (Lower two panels) Cells were transfected either with D<sub>2</sub>R-GFP or D<sub>2</sub>R-PKCX-GFP, and processed as in upper two panels. The horizontal bars represent 10 μm.

**A**

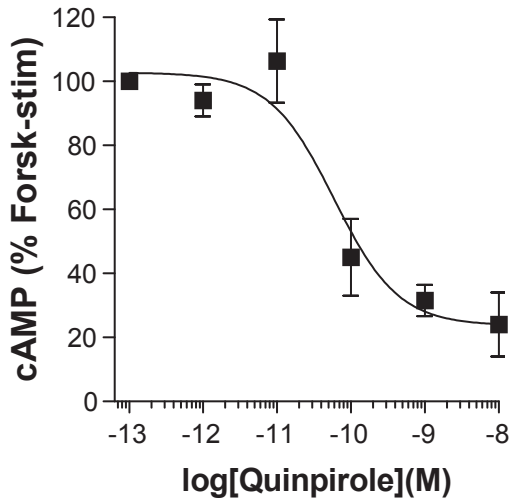

**B**

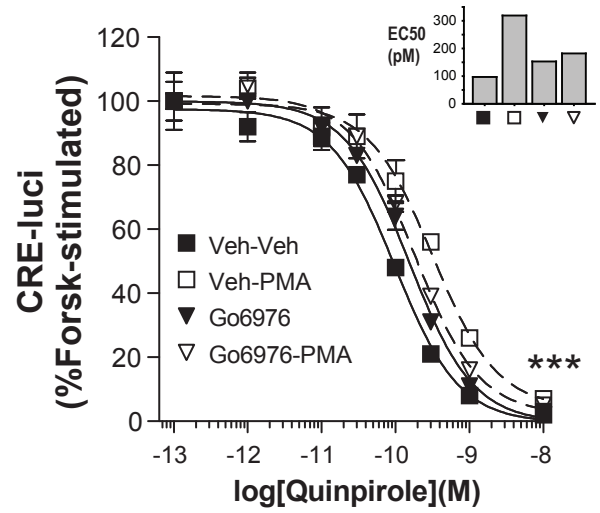

**C**

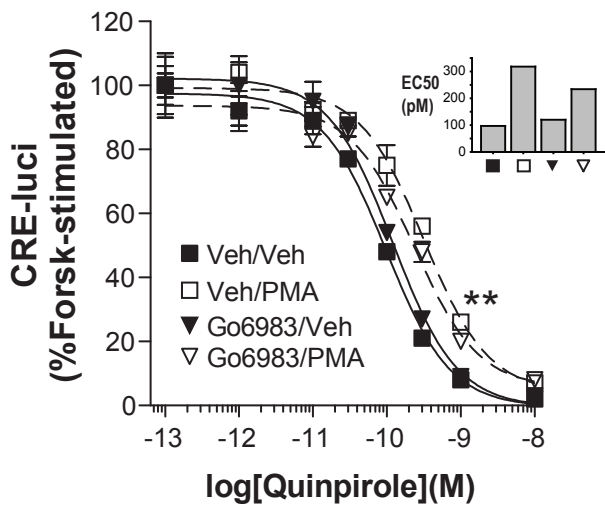

**D**

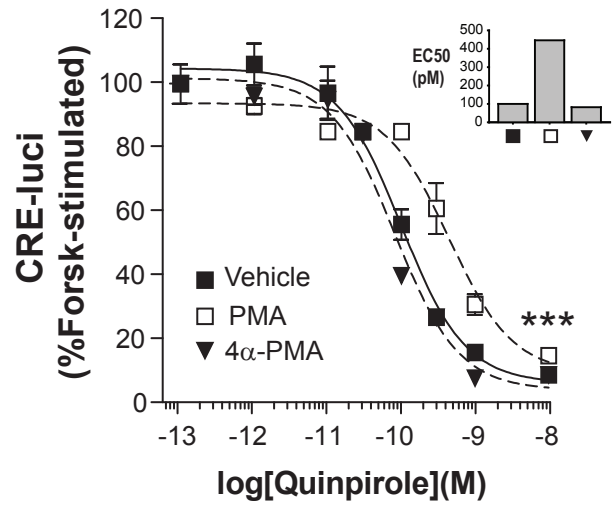

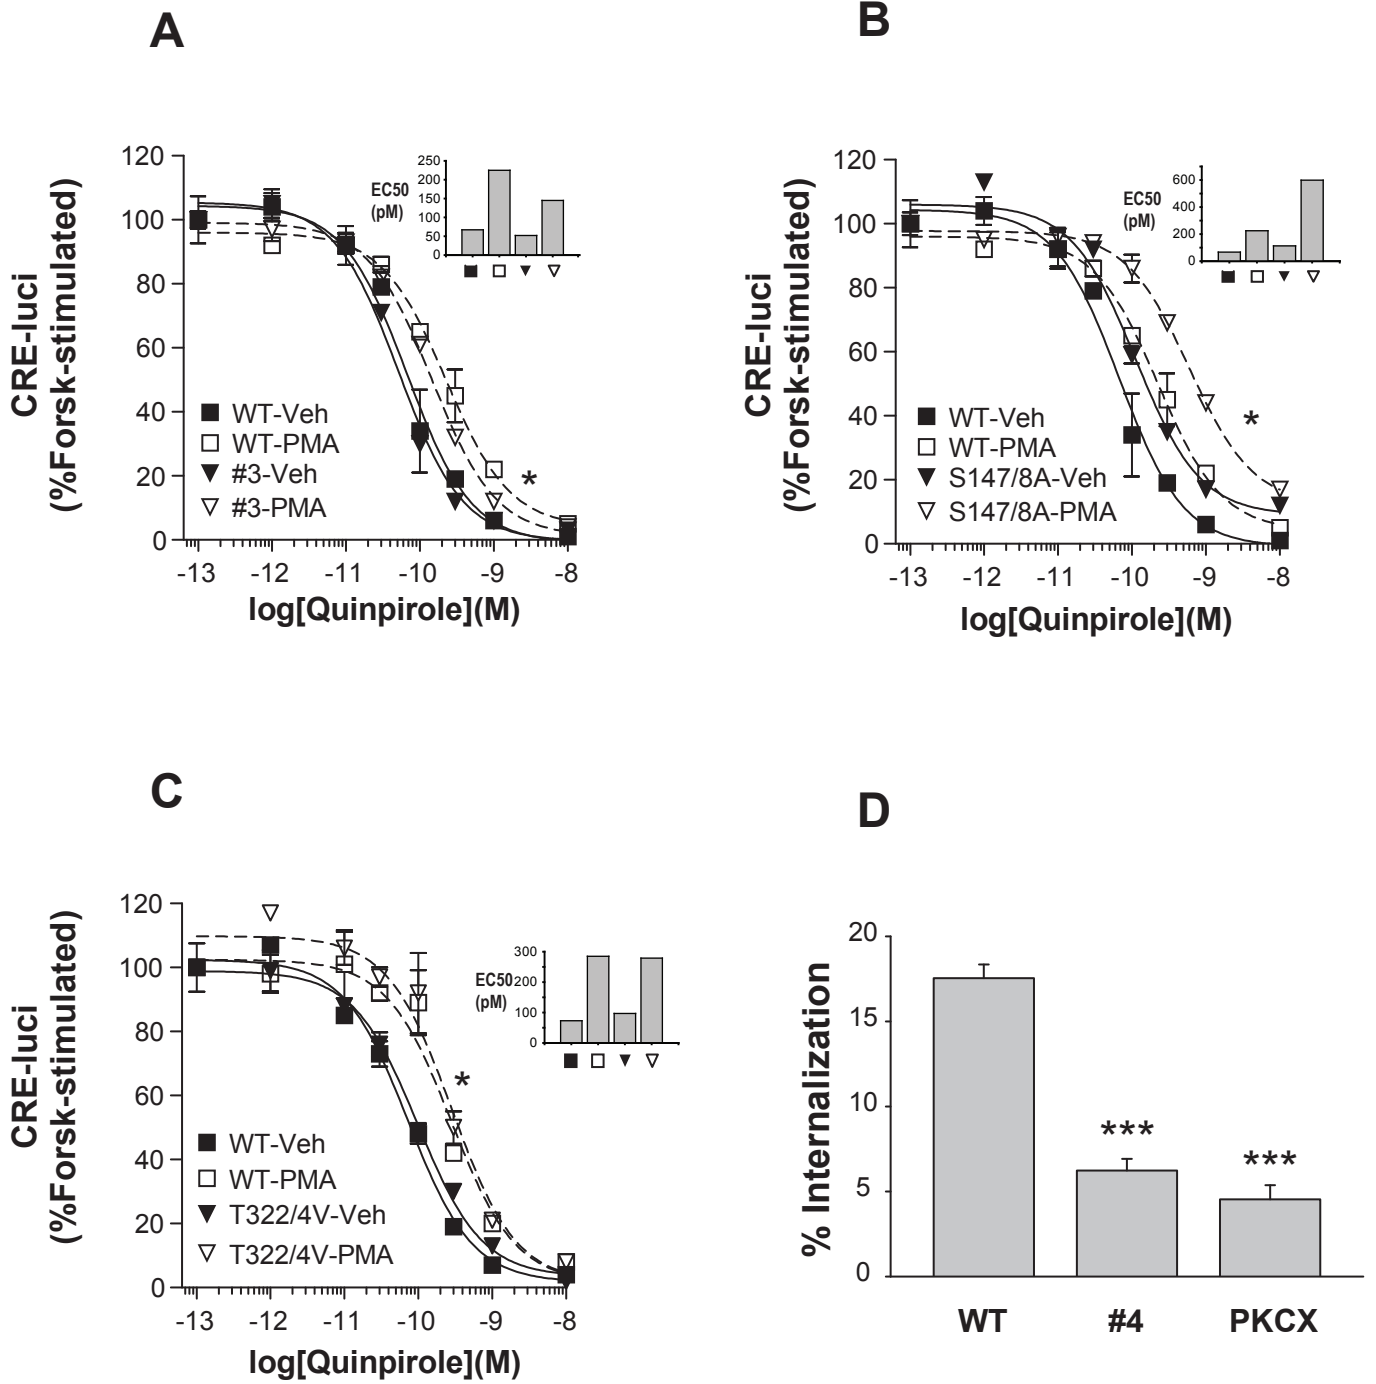

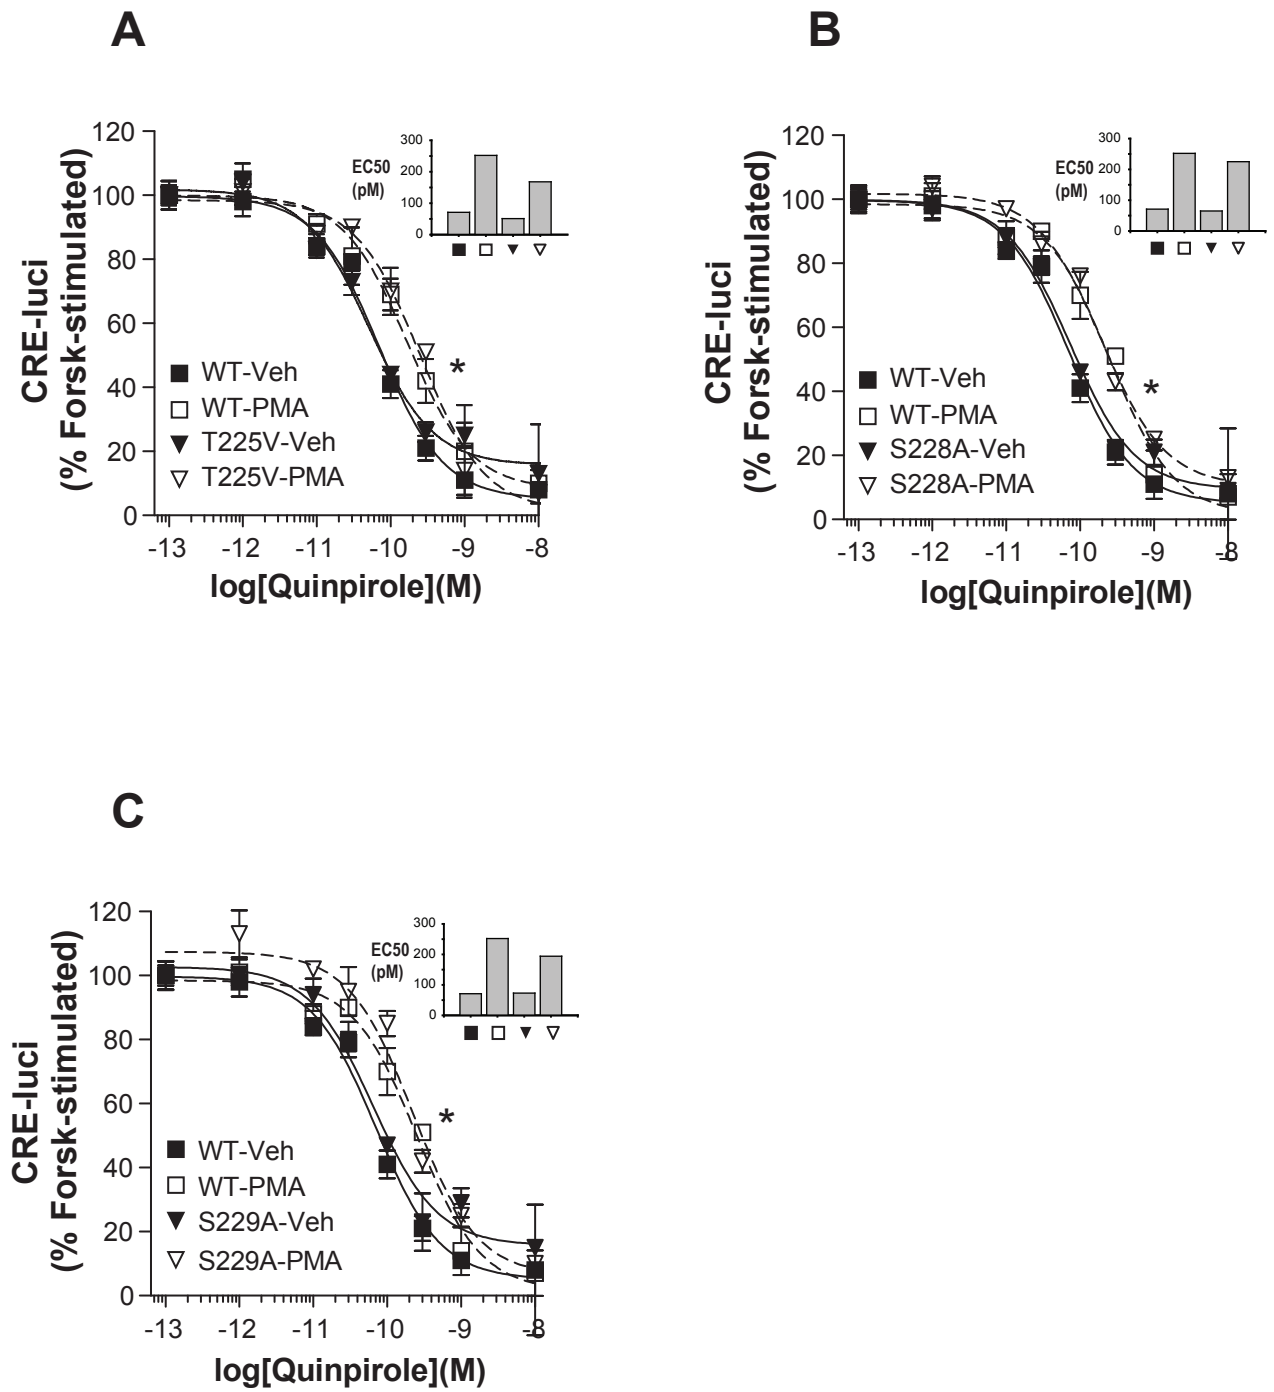

**A**

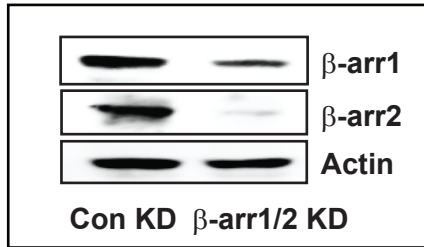

**B**

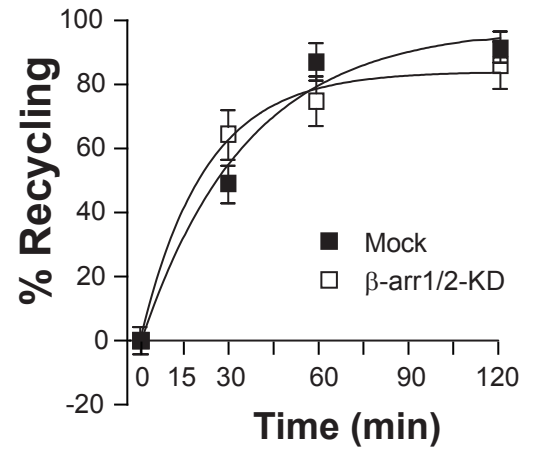

**C. Rab5**

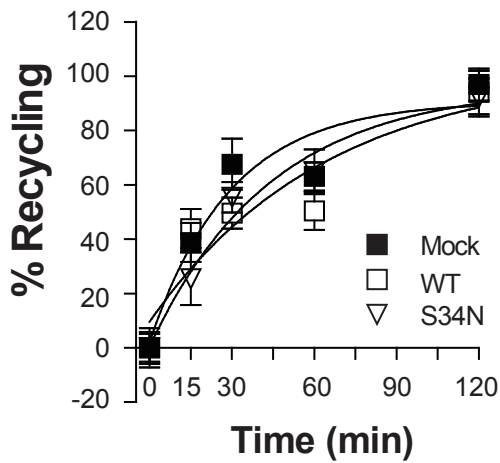

**D. Rab23**

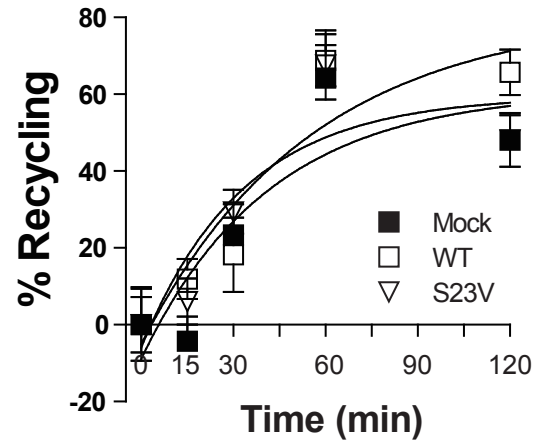



### A. Quin-treated

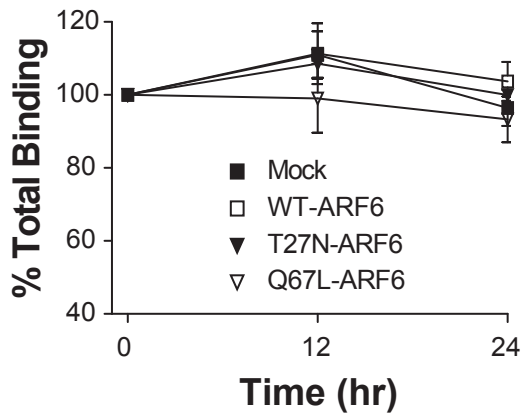

### B. DA-treated

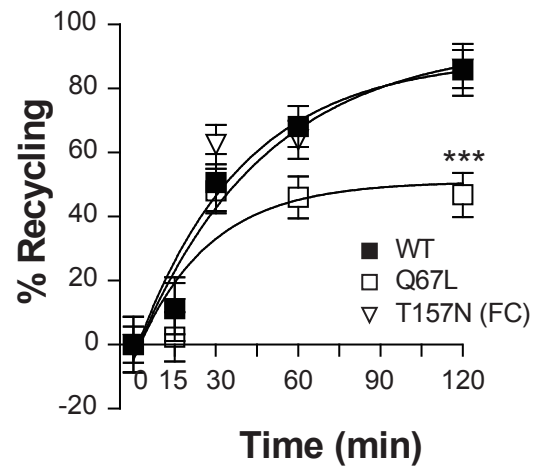

### C. PMA-treated

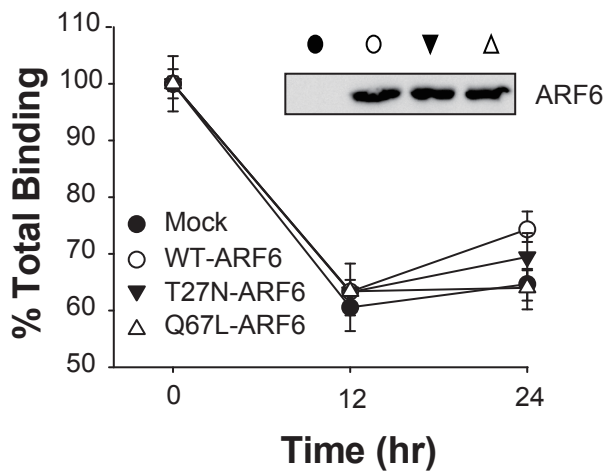

### D. ARF6-Knockdown

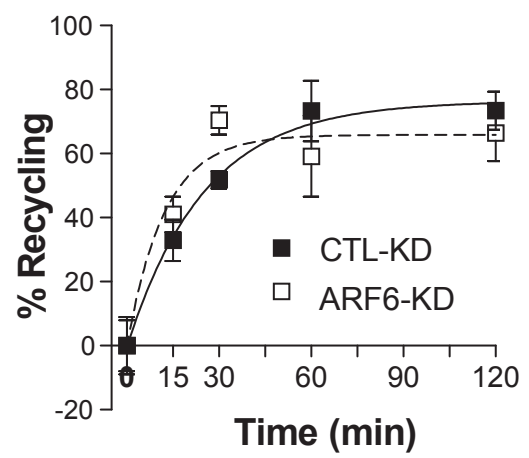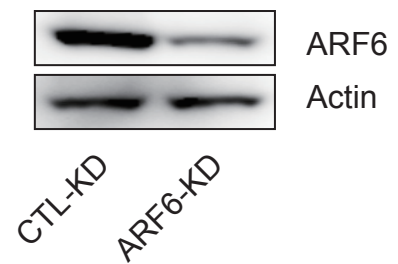

**A**

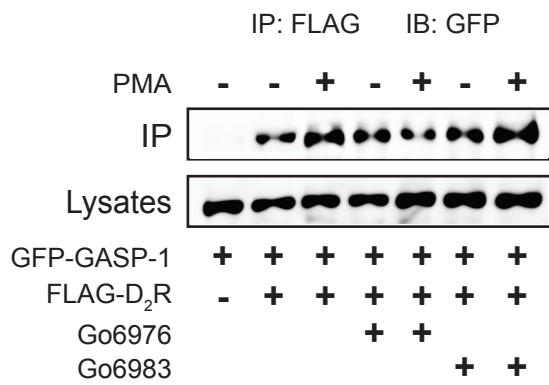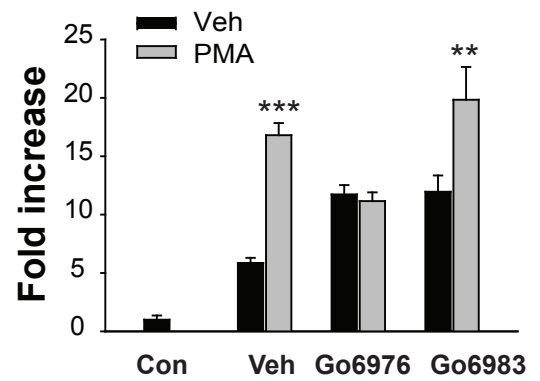

**B. SH-SY5Y cells**

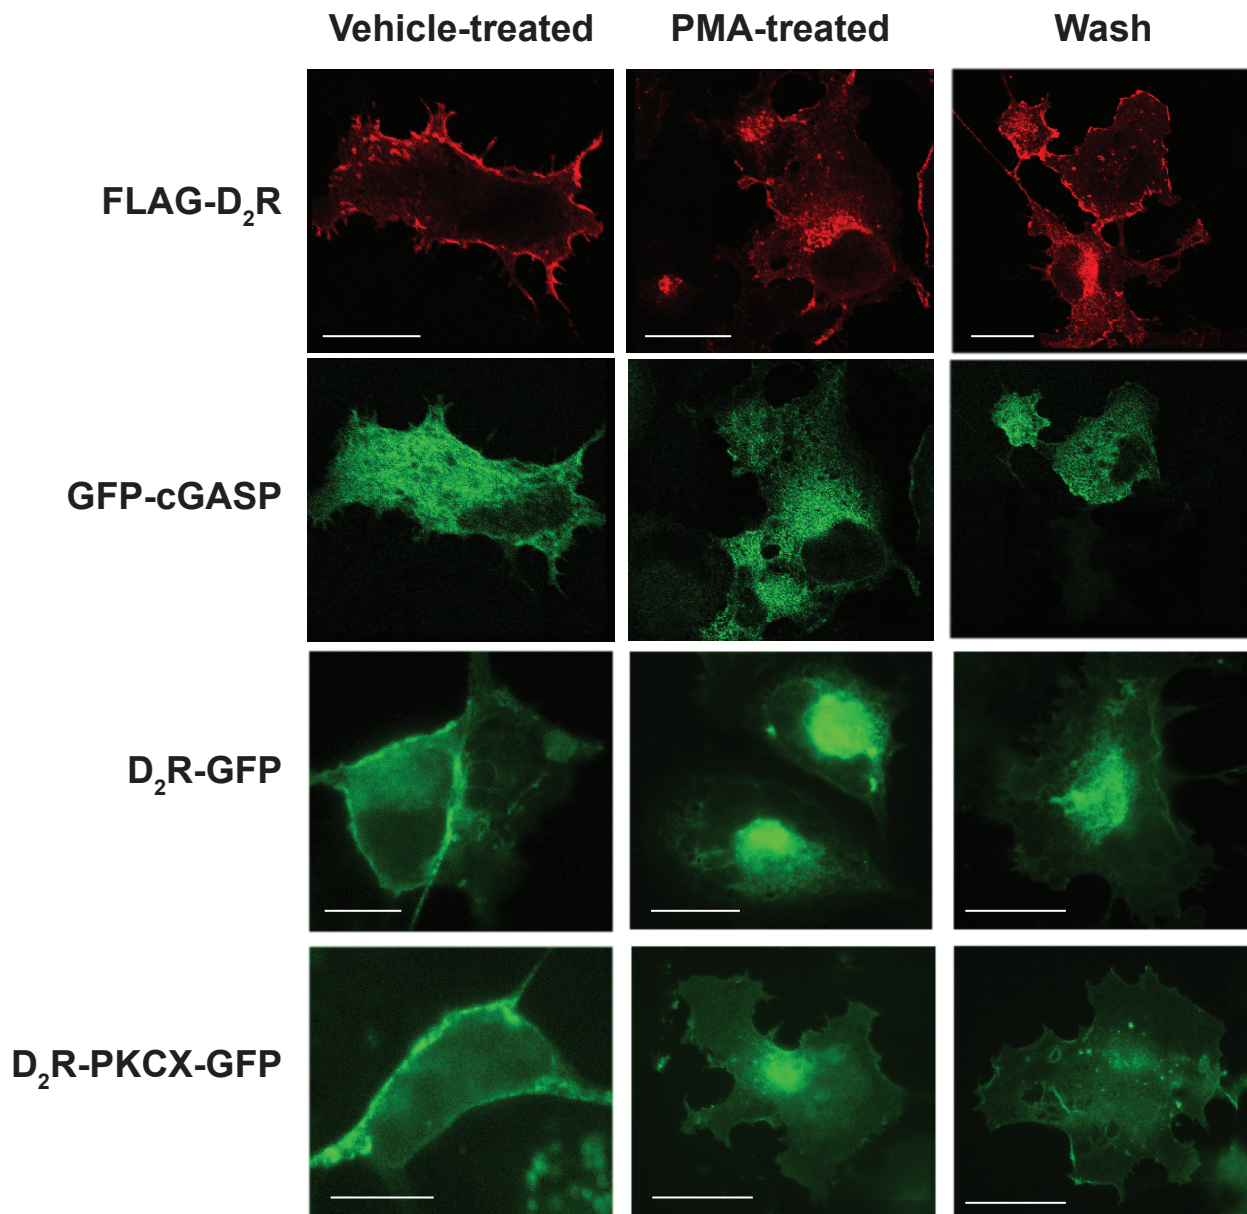

Supplement: bph0168-1355-SD1.pdf [file bph0168-1355-SD1.pdf]
